# Supplementary material for: Molecular Dynamics Simulations of the Short-Chain Fluorocarbon Surfactant PFHXA and the Anionic Surfactant SDS at the Air/Water Interface
Source: MDPI journal article supplement (doi:10.3390/molecules29071606), 2024-04-03
Supplement: s1 [file s1]

# Supporting information

## Molecular Dynamics Simulations of the Short-Chain Fluorocarbon Surfactant PFH<sub>x</sub>A and the Anionic Surfactant SDS at the Air/Water Interface

Jinqing Jiao <sup>1,\*†</sup>, Tao Li <sup>2,†</sup>, Guangwen Zhang <sup>1</sup>, Jing Xiong <sup>2</sup>, Xuqing Lang <sup>1</sup>, Xiaolong Quan <sup>2</sup>, Yiwei Cheng <sup>1</sup> and Yuechang Wei <sup>2,\*</sup>

<sup>1</sup> State Key Laboratory of Chemical Safety, SINOPEC Research Institute of Safety Engineering Co., Ltd., Qingdao 266071, China

<sup>2</sup> State Key Laboratory of Heavy Oil Processing, China University of Petroleum (Beijing), Beijing 102249, China

\* Correspondence: jiaojq.qday@sinopec.com (J.J.); weiyw@cup.edu.cn (Y.W.)

† These authors contributed equally to this work.



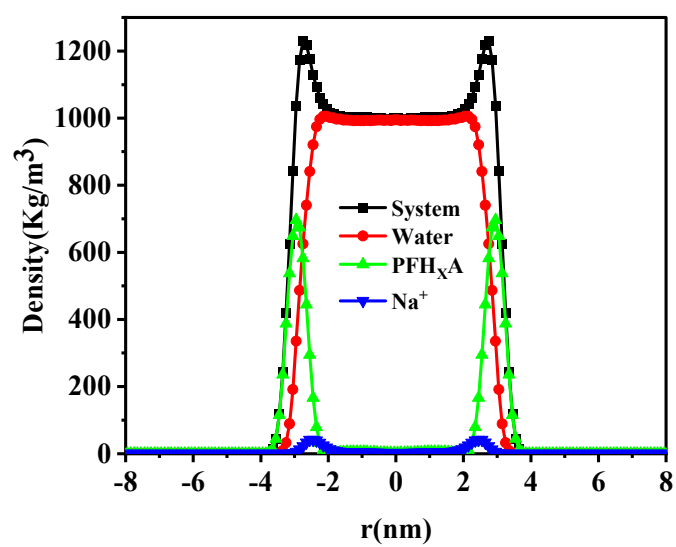

Figure S3. Density distribution profiles of pure PFHxA surfactant at gas-liquid interface.

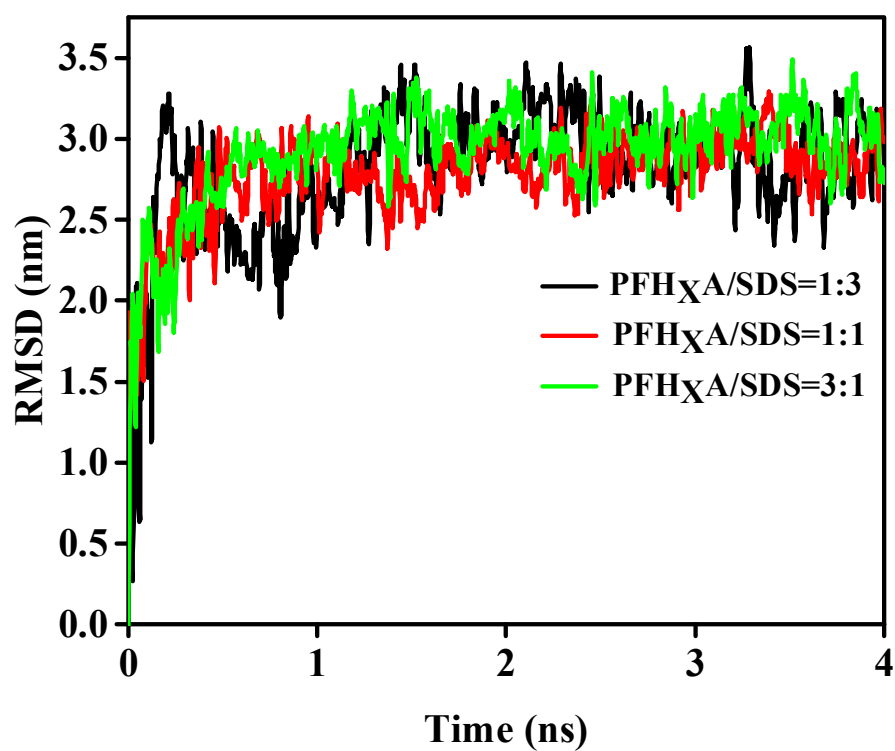

Figure S4. Average RMSD for the PFHxA surfactant in the mixed monolayers.
